# Supplementary material for: A Sonic Hedgehog-Gli-Bmi1 signaling pathway plays a critical role in p27 deficiency induced bone anabolism
Source: PubMed Central journal article supplement (PMC8771843; doi:10.7150/ijbs.65954), 2022-01-01
Supplement: ijbsv18p0956s1.pdf [file ijbsv18p0956s1.pdf]

**Supplemental Table 1: Differential expression of genes (DEGs) between p27<sup>-/-</sup> and WT mice**

| Gene          | p-Value     | Fold change | p27 <sup>-/-</sup> VS WT |
|---------------|-------------|-------------|--------------------------|
| Hif3a         | 0.006813774 | 1.9198179   | up                       |
| Gfm2          | 0.048074663 | 2.056672    | up                       |
| Gtf2ird1      | 0.011527861 | 1.7260659   | up                       |
| Scml2         | 0.006767468 | 1.6966984   | up                       |
| Phactr3       | 1.32E-02    | 1.5896102   | up                       |
| Josd2         | 0.032291315 | 2.1579154   | up                       |
| Tsen34        | 0.031220352 | 2.1341693   | up                       |
| Ypel1         | 0.030278603 | 1.9805248   | up                       |
| 1700022K14Rik | 0.012234127 | 2.1624827   | up                       |
| Stx6          | 0.022591665 | 1.7559271   | up                       |
| Ppp1r12c      | 0.00099608  | 1.5169258   | up                       |
| Smc4          | 0.000341513 | 1.853598    | up                       |
| Pole2         | 0.027008342 | 1.6195295   | up                       |
| 2700007P21Rik | 1.91E-02    | 1.7063528   | up                       |
| Dnajc1        | 0.011500709 | 1.671233    | up                       |
| 2810006K23Rik | 0.033279218 | 1.7962182   | up                       |
| Hbs1l         | 0.003407194 | 1.8127105   | up                       |
| Gm10664       | 0.046649475 | 1.6082802   | up                       |
| Eif2ak1       | 0.03434675  | 1.711598    | up                       |
| 4921534H16Rik | 0.001433927 | 2.2525785   | up                       |
| Scamp1        | 0.030321397 | 1.6704565   | up                       |
| Slc39a8       | 0.032230157 | 1.7144119   | up                       |
| 4930581F22Rik | 0.017603585 | 2.4115288   | up                       |
| 6030468B19Rik | 0.039658662 | 1.5131792   | up                       |
| Adk           | 0.030560704 | 1.5723747   | up                       |
| BMI1          | 0.008023806 | 1.7473743   | up                       |
| Spag9         | 0.04126587  | 1.6458555   | up                       |
| Pde1c         | 0.042807814 | 1.5995237   | up                       |
| Usp25         | 0.02842498  | 1.7701699   | up                       |
| Dlx6os1       | 0.035242897 | 1.9911327   | up                       |
| Cyb5r4        | 0.004205644 | 1.7764735   | up                       |
| Rangap1       | 3.29E-02    | 1.9350888   | up                       |
| Slc20a1       | 0.023770427 | 1.7847558   | up                       |
| Ache          | 0.048093397 | 1.5083127   | up                       |
| Kif18a        | 0.029764665 | 1.5028707   | up                       |
| AU042671      | 0.004370066 | 1.545073    | up                       |
| Ptpn5         | 0.013456148 | 1.7445385   | up                       |
| A930006K02Rik | 0.007842793 | 1.7534032   | up                       |
| Trim2         | 0.007391815 | 1.6964      | up                       |
| 4930523C07Rik | 0.004368249 | 1.6815472   | up                       |
| Narg2         | 0.04345669  | 1.5971301   | up                       |

|               |             |           |    |
|---------------|-------------|-----------|----|
| Cep152        | 0.011154918 | 1.5021973 | up |
| Ank3          | 0.018799877 | 1.8827225 | up |
| 3830408C21Rik | 3.76E-03    | 1.643649  | up |
| Pnma2         | 0.004952461 | 1.8894969 | up |
| Ubr4          | 0.04288284  | 1.5745407 | up |
| Grik1         | 1.27E-02    | 1.5208843 | up |
| Dpysl5        | 0.031067101 | 1.5641336 | up |
| Prpf40a       | 0.01582676  | 1.6784904 | up |
| Pbx1          | 0.015612504 | 1.5238736 | up |
| Herc1         | 0.031743083 | 1.5670356 | up |
| Fbxw2         | 0.023987606 | 1.6260377 | up |
| Pax6          | 0.04976317  | 1.5026462 | up |
| 4930422G04Rik | 0.010625852 | 1.562629  | up |
| Gm10125       | 0.023554841 | 1.6054553 | up |
| Phf2011       | 0.022313602 | 1.6682572 | up |
| Gad1          | 0.026926296 | 2.0303092 | up |
| Cltc          | 0.017984144 | 1.7226907 | up |
| Scfd1         | 0.032045715 | 1.7493384 | up |
| Nfx11         | 0.029962901 | 1.5298336 | up |
| Pbx3          | 0.036291458 | 2.72911   | up |
| Tubgcp6       | 0.011564284 | 1.5050344 | up |
| Myom1         | 0.024919355 | 1.5505034 | up |
| Ano1          | 0.022994816 | 1.6297314 | up |
| 9630013D21Rik | 0.030266207 | 1.5367644 | up |
| E030019B13Rik | 0.036404736 | 1.5858864 | up |
| 2900092D14Rik | 5.00E-02    | 1.5208743 | up |
| Ntng1         | 0.001869703 | 1.6714325 | up |
| Whsc1         | 0.018748114 | 1.6324166 | up |
| Acta2         | 0.002835201 | 2.283572  | up |
| D430019H16Rik | 0.011399334 | 1.7220901 | up |
| Sec16a        | 0.002065038 | 1.5225384 | up |
| Sgms1         | 0.018265389 | 1.8984824 | up |
| 1500004A13Rik | 0.022576937 | 1.9140574 | up |
| Kidins220     | 0.04017319  | 1.6130106 | up |
| Cdc2l5        | 0.015564305 | 1.6571245 | up |
| Fanci         | 0.026586007 | 1.6740841 | up |
| Ralgapa2      | 0.002649085 | 1.6978652 | up |
| Sh3glb1       | 0.03650072  | 1.5150739 | up |
| Mtap2         | 0.001746766 | 1.8181847 | up |
| Kctd9         | 0.039712653 | 1.6902101 | up |
| Nfib          | 0.026297161 | 1.7240595 | up |
| Ttc3          | 0.007590866 | 1.7065998 | up |
| Camkk2        | 0.02279199  | 1.9318615 | up |
| Phf16         | 0.00934503  | 1.5218512 | up |

|           |             |           |    |
|-----------|-------------|-----------|----|
| Zfp2      | 0.042938553 | 2.0544083 | up |
| Phf13     | 0.043404307 | 1.7998159 | up |
| Adamts11  | 0.014694111 | 1.5254096 | up |
| Cpt1c     | 0.019335708 | 1.5719705 | up |
| Fbxo25    | 7.45E-03    | 1.5688069 | up |
| Agri      | 4.99E-02    | 1.988508  | up |
| St18      | 0.047575947 | 1.6935782 | up |
| Dennd2c   | 0.04983152  | 1.5309565 | up |
| Pard3     | 0.009653779 | 1.6117215 | up |
| G2e3      | 0.025907952 | 2.089872  | up |
| Gtf2a2    | 0.038342632 | 1.7607752 | up |
| Pip4k2c   | 0.028222697 | 1.7031034 | up |
| Mpp2      | 0.004660428 | 1.5812099 | up |
| Csf3r     | 0.006535446 | 1.5378277 | up |
| Fut10     | 0.003743915 | 1.6481959 | up |
| Traf3     | 0.034423735 | 1.5169008 | up |
| Adc       | 2.54E-02    | 1.7211494 | up |
| Eng       | 0.019119276 | 1.5347933 | up |
| Atp8a1    | 0.037308857 | 1.5766284 | up |
| Vps37d    | 0.031638585 | 1.7996309 | up |
| Vps13c    | 0.009043626 | 1.7164564 | up |
| Tatdn1    | 0.030202426 | 1.5101898 | up |
| Tmem41b   | 0.020038074 | 1.5459619 | up |
| Clcn3     | 6.74E-03    | 1.7466346 | up |
| Dtl       | 0.034638982 | 1.931626  | up |
| Ralgps2   | 0.004006786 | 2.385793  | up |
| Fam78a    | 0.015391202 | 1.588701  | up |
| Supt4h1   | 0.04283668  | 1.6624799 | up |
| Pggt1b    | 2.20E-02    | 1.6319742 | up |
| Atp6v0a1  | 0.029006097 | 1.5117065 | up |
| Rptor     | 0.006292053 | 1.8530173 | up |
| Krba1     | 0.04361059  | 1.5995083 | up |
| Hs2st1    | 0.048081025 | 1.6417482 | up |
| Phactr4   | 0.016076382 | 1.5597383 | up |
| Klhl2     | 0.033217855 | 1.5390202 | up |
| Cd200r3   | 0.013836836 | 1.9967722 | up |
| Mier1     | 3.63E-02    | 1.5799477 | up |
| Mpst      | 0.037419457 | 1.5703481 | up |
| Cep290    | 0.0351727   | 1.5978186 | up |
| Fzr1      | 0.010625714 | 1.565763  | up |
| Epb4.114a | 0.029593563 | 1.59694   | up |
| Ppp1r14a  | 0.02241092  | 1.5889751 | up |
| Hebp1     | 0.031018713 | 1.5806602 | up |
| Banp      | 0.048462816 | 1.5426905 | up |

|               |             |           |    |
|---------------|-------------|-----------|----|
| Sfrp2         | 0.012606891 | 1.633272  | up |
| Acsl6         | 0.000778796 | 1.5931095 | up |
| L2hgdh        | 0.04302605  | 1.708312  | up |
| Car15         | 0.002280915 | 1.554754  | up |
| Sostdc1       | 0.018604796 | 1.8455147 | up |
| Slc6a9        | 0.039542343 | 1.5492744 | up |
| Slc16a14      | 0.013769816 | 1.5961004 | up |
| Dcaf8         | 2.01E-02    | 1.9857337 | up |
| Nup133        | 0.013619601 | 1.5246464 | up |
| Depdc1a       | 3.40E-02    | 1.6380559 | up |
| 1700054N08Rik | 0.004812595 | 1.5713855 | up |
| Optn          | 0.016817195 | 1.5234989 | up |
| Lrrc8c        | 0.003198938 | 1.6103817 | up |
| Bola1         | 0.00455713  | 1.6746883 | up |
| Setd4         | 0.04259452  | 1.5727671 | up |
| Nefl          | 0.002748787 | 2.0225625 | up |
| Nmral1        | 0.010667702 | 1.5595568 | up |
| Pcdhb20       | 2.08E-02    | 1.7989018 | up |
| Fgfr4         | 0.03807412  | 3.6547275 | up |
| Spc25         | 0.004565729 | 1.667323  | up |
| Fam174b       | 0.009689888 | 1.7199234 | up |
| Fnbp11        | 0.021523325 | 1.5603911 | up |
| Evc2          | 0.025644708 | 1.7700487 | up |
| Mrpl20        | 0.010350404 | 1.5302736 | up |
| Kifap3        | 0.024536425 | 1.8255872 | up |
| Kdm5c         | 0.006100858 | 1.5829114 | up |
| 1700109H08Rik | 2.52E-02    | 1.5279427 | up |
| Zcchc12       | 0.035802517 | 1.5136443 | up |
| Actl6b        | 0.042984024 | 1.5929363 | up |
| Asb17         | 0.002262987 | 2.2164958 | up |
| Gm550         | 6.72E-04    | 1.6212245 | up |
| Vrk1          | 0.015476056 | 1.5710655 | up |
| Sult4a1       | 0.008902832 | 1.6617827 | up |
| Kcnb1         | 0.022830954 | 1.5121417 | up |
| Cd226         | 0.002536955 | 1.56667   | up |
| Phf2          | 8.71E-03    | 1.5304855 | up |
| Adck5         | 0.045307472 | 1.6140233 | up |
| Heph          | 2.16E-02    | 1.5720904 | up |
| Grial         | 0.04063761  | 1.9808527 | up |
| Tbc1d16       | 0.047542855 | 1.9026843 | up |
| Shb           | 0.041730467 | 1.8957767 | up |
| Mid1          | 0.004482281 | 2.0982378 | up |
| Chl1          | 1.71E-02    | 1.5389154 | up |
| Trio          | 4.61E-02    | 1.7885275 | up |

|               |             |           |    |
|---------------|-------------|-----------|----|
| 5133400G04Rik | 0.02927075  | 1.6714579 | up |
| Zbtb12        | 0.002799203 | 1.5916327 | up |
| Shh           | 0.003702286 | 2.046396  | up |
| Zmym1         | 0.02498732  | 1.6778214 | up |
| Kif24         | 0.004092569 | 1.8327355 | up |
| Mars          | 0.04523676  | 1.5666969 | up |
| Eef1d         | 0.00167156  | 1.8063601 | up |
| Nrsn2         | 0.007324749 | 1.535694  | up |
| D8Ert82e      | 0.039315633 | 1.7385659 | up |
| Mgat5b        | 0.017002417 | 1.9778466 | up |
| Cxcr6         | 0.030320175 | 1.5409533 | up |
| Zfp526        | 0.025356343 | 1.7271359 | up |
| Msc           | 5.39E-03    | 1.6763337 | up |
| Syn3          | 2.92E-02    | 1.9224021 | up |
| Zfp398        | 0.03429047  | 1.646447  | up |
| Traf3ip1      | 0.003910691 | 1.5297582 | up |
| 9630041N07Rik | 3.14E-02    | 1.8766905 | up |
| Preli2        | 4.52E-02    | 1.5318474 | up |
| Igsf1         | 0.032246884 | 1.5502374 | up |
| Pin4          | 0.002618992 | 1.7725809 | up |
| Trpc4         | 0.02514826  | 2.1032279 | up |
| Rab37         | 0.038334012 | 1.7823943 | up |
| Rwdd3         | 3.71E-02    | 1.5742462 | up |
| Gli1          | 0.0333512   | 1.7208974 | up |
| Rnf43         | 0.023926888 | 1.9541423 | up |
| Fbxl16        | 0.037575155 | 1.8992124 | up |
| Rai1          | 1.89E-02    | 1.7145332 | up |
| Olf356        | 3.43E-02    | 1.5809271 | up |
| Mon1b         | 0.023545753 | 1.9901531 | up |
| Trappc10      | 0.009988194 | 1.5996057 | up |
| Lrp8          | 0.016690513 | 1.5094159 | up |
| Lrfr1         | 0.031439297 | 1.8431647 | up |
| Cenpf         | 0.00501913  | 1.5344753 | up |
| Ska1          | 0.03927345  | 1.6913077 | up |
| Slc24a2       | 0.040012818 | 1.7051401 | up |
| A630033E08Rik | 1.51E-03    | 1.5128121 | up |
| Comt1         | 2.01E-02    | 1.5077305 | up |
| Caprin1       | 1.21E-02    | 1.7235683 | up |
| Cdkn1c        | 0.043793436 | 1.7526987 | up |
| Figl2         | 0.011035137 | 1.6060905 | up |
| 1700008J07Rik | 0.022866057 | 1.5581483 | up |
| E130102H24Rik | 4.37E-02    | 1.5013618 | up |
| Gm3323        | 3.87E-02    | 1.5674521 | up |
| Gm3363        | 0.017088987 | 1.5079702 | up |

|               |             |           |      |
|---------------|-------------|-----------|------|
| D430020J02Rik | 0.027515756 | 1.7787156 | up   |
| Gm3793        | 0.027681686 | 1.580609  | up   |
| Gm3902        | 0.04267927  | 1.7090073 | up   |
| Gm4005        | 4.69E-02    | 1.8161126 | up   |
| Gm4589        | 1.34E-02    | 1.6096437 | up   |
| Zbtb11        | 0.039642666 | 1.6794349 | up   |
| Six3os1       | 0.017700527 | 2.6347125 | up   |
| Rnf165        | 0.010548617 | 1.5488459 | up   |
| Gm6661        | 3.55E-02    | 1.6210086 | up   |
| Cdkn3         | 0.02276836  | 1.9105551 | up   |
| Wnk3          | 1.69E-02    | 1.7973477 | up   |
| AI854517      | 2.10E-02    | 2.0270143 | up   |
| Gm8122        | 0.039627153 | 1.727499  | up   |
| Gm5843        | 0.042833216 | 1.6195155 | up   |
| Hoxa3         | 0.009476123 | 1.9291255 | up   |
| GLI2          | 0.030570898 | 1.9562594 | up   |
| SMO           | 0.019864157 | 1.1717683 | up   |
| Cav2          | 0.011254692 | 1.5810964 | down |
| Sec16b        | 0.007784648 | 1.667091  | down |
| Sirpb1        | 5.35E-03    | 1.6332817 | down |
| Camk2b        | 0.012783773 | 1.8584719 | down |
| Arhgap6       | 0.027896946 | 1.7030832 | down |
| Clip1         | 2.52E-02    | 1.6160315 | down |
| Rgs14         | 0.012158901 | 2.5456572 | down |
| 1700123M08Rik | 0.046681587 | 1.797492  | down |
| 1110020A21Rik | 0.017764922 | 1.8466129 | down |
| Fam35a        | 0.034668148 | 1.5496222 | down |
| 4921525O09Rik | 0.007947727 | 2.0384862 | down |
| Mllt4         | 0.001347493 | 1.5397071 | down |
| Orly          | 0.00324209  | 1.8372831 | down |
| 5031434O11Rik | 0.015025012 | 1.7791466 | down |
| Col27a1       | 7.19E-03    | 1.6936744 | down |
| Pde7b         | 0.037070427 | 1.5184733 | down |
| Ddx3y         | 0.030008448 | 1.7068537 | down |
| Lpp           | 0.044938993 | 1.5216612 | down |
| Zmym6         | 0.0248313   | 2.1685143 | down |
| D930016D06Rik | 3.57E-02    | 1.5317036 | down |
| Ifi203        | 0.023343824 | 1.6095761 | down |
| Atg2a         | 0.007521004 | 3.1187139 | down |
| Ankrd35       | 0.04053417  | 1.6417829 | down |
| Tm6sf1        | 0.006634045 | 1.6672502 | down |
| Rps6kc1       | 0.030508827 | 1.8060861 | down |
| Sgca          | 0.019845283 | 2.3395438 | down |
| Pias4         | 0.008700271 | 1.7062107 | down |

|               |             |           |      |
|---------------|-------------|-----------|------|
| Golim4        | 0.013698566 | 1.605226  | down |
| Elk1          | 0.021999974 | 1.6259598 | down |
| Fam175b       | 0.02087558  | 1.5071656 | down |
| D930048N14Rik | 0.002669771 | 1.959929  | down |
| Nr4a2         | 1.07E-02    | 1.5717517 | down |
| Smpd2         | 0.005064898 | 1.5949556 | down |
| Kcnk13        | 0.009893609 | 1.6829817 | down |
| Rhobtb2       | 0.009417764 | 1.571666  | down |
| Slc7a6os      | 0.00636117  | 1.7180996 | down |
| Vps33b        | 0.017532343 | 1.5756564 | down |
| Pdlim2        | 0.008752701 | 2.1171267 | down |
| Ciita         | 0.009178646 | 1.7869687 | down |
| Gm1008        | 0.045903392 | 1.7266843 | down |
| Nat10         | 0.015212216 | 1.5176494 | down |
| Acacb         | 0.015930234 | 1.6100901 | down |
| Mynn          | 0.003547225 | 1.6524581 | down |
| Pstpip2       | 0.037859164 | 1.7150189 | down |
| B230312C02Rik | 0.035776205 | 1.5453473 | down |
| Rgnef         | 0.008927009 | 1.7358438 | down |
| Crebl2        | 0.006955992 | 1.7365364 | down |
| 1700052N19Rik | 0.019165669 | 1.804599  | down |
| Smtnl1        | 0.034256965 | 1.5026025 | down |
| Scamp2        | 0.009161644 | 1.7450056 | down |
| Cpxm1         | 0.038254738 | 1.5010518 | down |
| Rabep2        | 7.96E-04    | 1.5071177 | down |
| Ttc30a1       | 0.04720361  | 1.6031778 | down |
| 3200002M19Rik | 0.023400856 | 1.7047192 | down |
| Igh           | 0.03694332  | 2.9103131 | down |
| Creb3l3       | 0.03920853  | 1.5843288 | down |
| Rbbp9         | 0.001521936 | 1.5644697 | down |
| Qprt          | 0.04137094  | 1.7106218 | down |
| Cdkn1b        | 0.047972076 | 2.3650393 | down |
| Frzb          | 0.011413178 | 2.088803  | down |
| Fcna          | 0.018749839 | 1.5370244 | down |
| Atf3          | 0.036747675 | 2.4913125 | down |
| Ttll3         | 0.000127435 | 1.6840912 | down |
| D4Bwg0951e    | 0.020575535 | 1.5559317 | down |
| Tfpi2         | 0.004865132 | 1.9955555 | down |
| Perp          | 0.008289864 | 1.529645  | down |
| Aqp7          | 0.03818031  | 1.5668812 | down |
| P2rx3         | 0.032792516 | 1.620707  | down |
| Xlr4b         | 4.33E-02    | 1.5461386 | down |
| Jak3          | 0.033414863 | 1.8806745 | down |
| P2ry6         | 3.68E-02    | 1.7051193 | down |

|               |             |           |      |
|---------------|-------------|-----------|------|
| Casp12        | 0.018841758 | 2.0141523 | down |
| Dbnidd2       | 0.011783659 | 1.5335748 | down |
| Bglap-rs1     | 1.15E-02    | 1.5273781 | down |
| Slco4a1       | 0.017364454 | 1.7352546 | down |
| Paox          | 0.018337503 | 1.5011247 | down |
| Aspn          | 0.034345347 | 1.6275184 | down |
| Lynx1         | 0.01713467  | 1.8086661 | down |
| Acot11        | 0.029503943 | 1.7715969 | down |
| Rsph1         | 1.10E-02    | 1.549216  | down |
| Actg2         | 0.01317732  | 1.6675996 | down |
| 4933411K16Rik | 0.029858723 | 1.5800297 | down |
| Cyp2j6        | 0.002688697 | 1.5162892 | down |
| Tor3a         | 0.005020795 | 2.1834345 | down |
| Cd96          | 0.03207914  | 1.9108084 | down |
| Pld4          | 0.020958748 | 1.6556984 | down |
| Fmod          | 2.49E-02    | 1.7696937 | down |
| Trpc6         | 0.012838276 | 1.8765584 | down |
| H2-K1         | 5.02E-03    | 1.6752896 | down |
| Myo16         | 3.56E-02    | 1.5135589 | down |
| Zfp449        | 0.036487278 | 1.5902839 | down |
| 1110051M20Rik | 0.003462219 | 1.559447  | down |
| Csgalnact1    | 0.047053143 | 1.7436081 | down |
| 3110057O12Rik | 0.010632735 | 1.5604407 | down |
| Tmem177       | 0.04939468  | 1.5098695 | down |
| Ly9           | 0.008945195 | 1.9302589 | down |
| Card11        | 0.036025047 | 1.521121  | down |
| Refbp2        | 2.80E-02    | 1.5063359 | down |
| Tsnaxip1      | 2.23E-02    | 1.55527   | down |
| Serpin1c      | 0.010608555 | 1.9827956 | down |
| 1700029J07Rik | 0.041937236 | 1.770397  | down |
| Zfp641        | 0.023553038 | 1.556817  | down |
| Slc2a12       | 0.04868283  | 1.8123457 | down |
| Mepe          | 2.46E-02    | 1.584907  | down |
| Vpreb1        | 0.000317106 | 2.2577403 | down |
| 2310046A06Rik | 0.003520815 | 1.7502048 | down |
| Mnda          | 3.75E-02    | 1.6727124 | down |
| Cox18         | 0.04216266  | 1.5927383 | down |
| Bag3          | 0.01391275  | 1.6499329 | down |
| SUFU          | 0.03364187  | 1.9737358 | down |
| Rnase12       | 3.32E-02    | 1.6488485 | down |
| Vpreb2        | 0.048572533 | 1.9762888 | down |
| Rspo2         | 0.014198713 | 1.8794149 | down |
| Trim63        | 0.016715558 | 1.6659915 | down |
| Gm6316        | 1.21E-02    | 1.641121  | down |



|               |             |           |      |
|---------------|-------------|-----------|------|
| Aldoart1      | 0.03568287  | 4.0655413 | down |
| Aldoart2      | 0.034349777 | 2.2996223 | down |
| Ly6a          | 2.37E-02    | 1.7925441 | down |
| Amy2b         | 1.76E-02    | 1.8923837 | down |
| LOC547349     | 4.13E-02    | 3.454701  | down |
| Zfp831        | 0.03961507  | 1.7062659 | down |
| Cyp2c69       | 3.00E-02    | 2.2772725 | down |
| Cbfa2t3       | 0.037971817 | 1.6317364 | down |
| Abhd14a       | 0.028818158 | 1.6859397 | down |
| Amy2a5        | 4.13E-03    | 2.0677986 | down |
| Klra23        | 4.68E-02    | 2.1195457 | down |
| Gm7027        | 0.04483205  | 1.685265  | down |
| Hoxa11as      | 0.023755506 | 1.7007066 | down |
| Aqp4          | 0.020595202 | 1.5613228 | down |
| Gm12617       | 3.66E-02    | 4.2030272 | down |
| Gm9339        | 0.010502324 | 1.8527687 | down |
| Gm5784        | 0.024868064 | 1.6172887 | down |
| Gm2025        | 1.82E-02    | 2.6562324 | down |
| Gm9776        | 3.78E-02    | 1.8087558 | down |
| Gm2212        | 4.48E-02    | 1.5303667 | down |
| Gm2289        | 1.20E-02    | 1.8949467 | down |
| Gm9808        | 0.016375463 | 3.093326  | down |
| B130034C11Rik | 1.11E-03    | 2.0175624 | down |
| Gm9457        | 3.30E-02    | 1.5465527 | down |
| Gm2414        | 0.031716023 | 1.7997339 | down |
| Gm2556        | 0.01261517  | 1.8734963 | down |
| Gm5222        | 1.69E-02    | 1.7702839 | down |
| Gm10270       | 3.01E-02    | 2.1994097 | down |
| Gm2640        | 0.020552106 | 2.5460064 | down |
| Gm2581        | 4.05E-02    | 2.198683  | down |
| Gm2724        | 8.16E-03    | 1.8851714 | down |
| Gm2758        | 0.026631974 | 1.6839665 | down |
| Gm2648        | 0.032429848 | 1.5828382 | down |
| Gm2917        | 3.51E-02    | 1.8304363 | down |
| Gm2797        | 0.041068833 | 1.6884123 | down |
| Gm5698        | 0.021672675 | 2.657222  | down |
| C920006O11Rik | 6.19E-05    | 3.2880456 | down |
| Gm3301        | 0.011949386 | 2.7820358 | down |
| Gm3219        | 0.00123454  | 1.6451725 | down |
| Gm3518        | 1.97E-03    | 1.8004127 | down |
| Gm11938       | 2.93E-02    | 2.3881085 | down |
| Gm3804        | 1.64E-02    | 1.5576179 | down |
| Gm3845        | 0.034088433 | 2.1645699 | down |
| Gm3884        | 3.86E-02    | 1.5455112 | down |

|            |             |           |      |
|------------|-------------|-----------|------|
| Gm6506     | 0.033121668 | 1.6462843 | down |
| Gm11589    | 0.01096218  | 1.9746552 | down |
| Gm10237    | 3.13E-02    | 2.4008148 | down |
| Gm5881     | 0.030925676 | 1.9964178 | down |
| Gm12770    | 0.03534486  | 1.8351032 | down |
| Smt3h2-ps2 | 0.03593512  | 1.5447472 | down |
| Gm4529     | 2.38E-02    | 3.1086211 | down |
| Gm9627     | 0.024913097 | 1.6314678 | down |
| Gm4588     | 0.005130137 | 2.0247645 | down |
| Gm4603     | 0.016977923 | 2.1975808 | down |
| Gm10077    | 0.028962163 | 2.1005323 | down |
| Gm4703     | 0.0365702   | 1.541587  | down |
| Gm9462     | 0.03332867  | 1.7291676 | down |
| Gm4986     | 4.32E-03    | 1.7182899 | down |
| Gm4963     | 0.016531017 | 2.3504543 | down |
| Gm4888     | 0.035646074 | 1.952753  | down |
| Gm6579     | 3.36E-02    | 1.6631883 | down |
| Lpar5      | 0.023394685 | 1.8726568 | down |
| PTCH1      | 0.008023806 | 1.7473743 | down |
| Gm5258     | 0.014624729 | 2.9415436 | down |
| Gm5265     | 0.026374469 | 1.6885926 | down |
| Gm5278     | 0.023607558 | 2.0393746 | down |
| Gm5449     | 4.90E-02    | 1.9021354 | down |
| Rpl2611    | 2.49E-03    | 1.6957425 | down |
| GLI3       | 0.048890356 | 1.5896938 | down |
| Gm13880    | 5.04E-03    | 2.0530453 | down |
| Gm5670     | 0.045809694 | 2.8745923 | down |
| Gm5699     | 0.024250697 | 2.1216083 | down |
| Gm13843    | 0.019613106 | 2.806521  | down |
| Glud2      | 0.02562094  | 1.9138448 | down |
| Gm5927     | 0.042043135 | 1.8997698 | down |
| Gm6141     | 0.011896855 | 1.963482  | down |
| Gm6109     | 4.85E-02    | 2.313615  | down |
| Gm6186     | 0.026456695 | 1.9758996 | down |
| Gm6259     | 1.49E-02    | 2.4817355 | down |
| Gm6272     | 0.0300803   | 4.7019205 | down |
| Gm6378     | 0.03572597  | 2.1870966 | down |
| Gm6665     | 0.021585941 | 1.5066156 | down |
| Gm6790     | 2.36E-03    | 2.5876424 | down |
| Gm6816     | 4.79E-03    | 2.1657379 | down |
| Gm6932     | 0.04554543  | 1.8720732 | down |
| Gm7288     | 0.029340666 | 1.7335596 | down |
| Gm7574     | 4.33E-02    | 1.9394716 | down |
| Gm7303     | 0.024536874 | 1.9788014 | down |

|        |             |           |      |
|--------|-------------|-----------|------|
| Gm4978 | 0.018426623 | 2.8667874 | down |
| Gm8024 | 1.90E-03    | 1.6958255 | down |
| Gm8055 | 0.022624057 | 1.6781082 | down |
| Gm8062 | 0.030168625 | 1.5916201 | down |
| Gm8882 | 2.16E-02    | 2.2502072 | down |
| Gm8951 | 0.017455403 | 1.7473725 | down |
| Gm9034 | 3.24E-02    | 2.5723088 | down |
| Gm5507 | 0.026388202 | 1.8448468 | down |

---
